# Supplementary material for: Al2O3–YAG:Ce composite phosphor ceramic: a thermally robust and efficient color converter for solid state laser lighting
Source: Royal Society of Chemistry journal article supplement (doi:10.1039/c6tc03215j), 2016-01-01
Supplement: c6tc03215j1.pdf [file c6tc03215j1.pdf]

## Supporting information

### **Al<sub>2</sub>O<sub>3</sub>-YAG:Ce composite phosphor ceramic: a thermally robust and efficient color converter for solid state laser lighting**

Shuxing Li, Qiangqiang Zhu, Daiming Tang, Xuejian Liu\*, George Ouyang, Liangliang Cao, Naoto Hirosaki, Toshiyuki Nishimura, Zhengren Huang, and Rong-Jun Xie\*

\*xie.rong-jun@nims.go.jp; xjliu@mail.sic.ac.cn

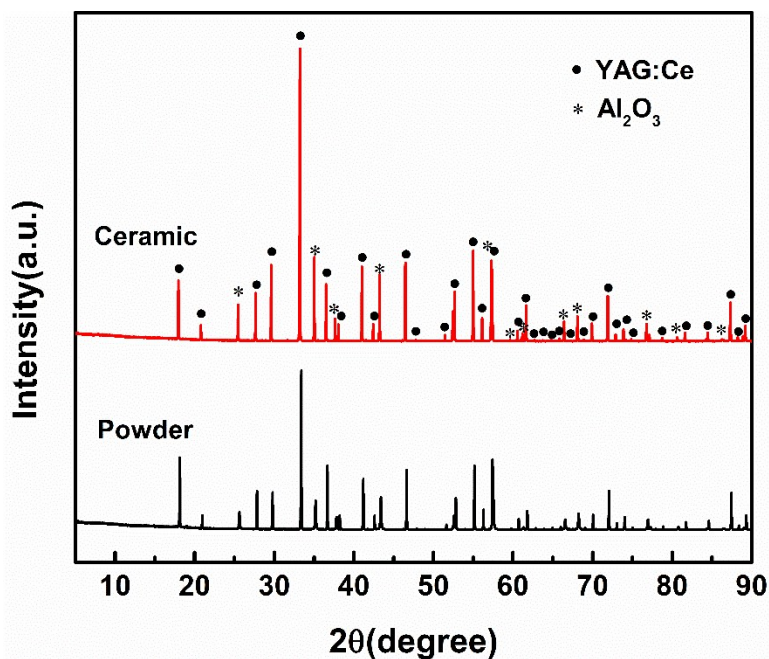

**Fig. S1.** The XRD patterns of the as-mixed powders and the sintered composite phosphor ceramic.
